# Supplementary material for: The Population Structure of Borrelia lusitaniae Is Reflected by a Population Division of Its Ixodes Vector
Source: Microorganisms. 2021 Apr 27;9(5):933. doi: 10.3390/microorganisms9050933 (PMC8145215; doi:10.3390/microorganisms9050933)
Supplement: Supplementary file 1 [file microorganisms-09-00933-s001.zip › Cópia de Table S1_S2_S3 tick_Borrelia data_corr_acc_10022021_titles_check.xlsx]

## Sheet: Table S1 Ticks 
Table S1 Ixodes tick samples included in this study including information on processing of samples
Tick ID 16S	Tick ID trospA	species (16S)	collection year	stage/ sex	B. lusitaniae infection status	MLST ID	Country	region	region in PT	collection month	Reference	source	latitude	longitude	stored	species identification	DNA extraction
GU074596TN	GU074839TN	Ixodes inopinatus#		F	unknown		Tunisia	Jbel el Jouza			Noureddine et al 2011
GU074598DZ‡	GU074841DZ	Ixodes inopinatus#		F	unknown		Algeria	El Tarf			Noureddine et al 2011
GU074602MA	GU074845MA	Ixodes inopinatus#		M	unknown		Morocco	Taza			Noureddine et al 2011
GU074597FR	GU074840FR‡	Ixodes ricinus		F	unknown		France	Forêt de Chizé			Noureddine et al 2011
GU074606ES‡	GU074849ES	Ixodes ricinus		F	unknown		Spain	Otxandio			Noureddine et al 2011
GU074595IE‡	GU074838IE	Ixodes ricinus		F	unknown		Ireland	Cork, Killarney NP			Noureddine et al 2011
GU074603GB	GU074846GB	Ixodes ricinus		N	unknown		England				Noureddine et al 2011
GU074607NL	GU074850NL	Ixodes ricinus		F	unknown		The Netherlands				Noureddine et al 2011
GU074605DE‡	GU074848DE	Ixodes ricinus		N	unknown		Germany	Munich, English garden			Noureddine et al 2011
GU074599IR	GU074842IR	Ixodes ricinus		F	unknown		Iran	Mazendaran province			Noureddine et al 2011
GU074592DK	GU074835DK	Ixodes ricinus		F	unknown		Denmark	Grib Skov Forest			Noureddine et al 2011
GU074593SE‡	GU074836SE	Ixodes ricinus		F	unknown		Sweden	Alsike			Noureddine et al 2011
GU074588SK	GU074831SK	Ixodes ricinus		F	unknown		Slovakia	Železná Studnička			Noureddine et al 2011
GU074589SK‡	GU074832SK‡	Ixodes ricinus		F	unknown		Slovakia	Vel'ký Lom			Noureddine et al 2011
GU074590SK	GU074833SK	Ixodes ricinus		F	unknown		Slovakia	Malá Lehota			Noureddine et al 2011
GU074594EE‡	GU074837EE‡	Ixodes ricinus		F	unknown		Estonia	Tartumaa			Noureddine et al 2011
GU074600FI	GU074843FI	Ixodes ricinus		F	unknown		Finland	Turku archipelago			Noureddine et al 2011
GU074604HU	GU074847HU	Ixodes ricinus		F	unknown		Hungary	Mátrafüred forest			Noureddine et al 2011
GU074591MD	GU074834MD‡	Ixodes ricinus		F	unknown		Moldova				Noureddine et al 2011
GU074601BG	GU074844BG	Ixodes ricinus		F	unknown		Bulgaria	Sofia			Noureddine et al 2011
13310PT18‡	13310PT18	Ixodes ricinus	2018	F	positive		Portugal	Santiago Cacém	south tagus	April	this study
13360PT18‡	13360PT18	Ixodes ricinus	2018	F	positive		Portugal	Grândola	south tagus	April	this study
14401PT18‡	14401PT18	Ixodes ricinus	2018	F	positive		Portugal	Santiago Cacém	south tagus	December	this study
G101PT09‡	G101PT09	Ixodes ricinus	2009	N	unknown		Portugal	Gerês	north tagus	February	this study	questing
R1756PT13‡	R1756PT13	Ixodes ricinus	2013	N	positive		Portugal	Mafra	north tagus	February	this study	questing	38.9614	-9.29417	ethanol 70%	morph, mol	DNAeasy blood and tissue kit, Qiagen
R1773PT13‡	R1773PT13	Ixodes ricinus	2013	N	positive		Portugal	Mafra	north tagus	February	this study	questing	38.9614	-9.29417	ethanol 70%	morph, mol	DNAeasy blood and tissue kit, Qiagen
R1812PT13‡	R1812PT13	Ixodes ricinus	2013	N	negative		Portugal	Mafra	north tagus	February	this study	questing	38.9614	-9.27833	ethanol 70%	morph, mol	DNAeasy blood and tissue kit, Qiagen
R1794PT13	R1794PT13	Ixodes ricinus	2013	N	negative		Portugal	Mafra	north tagus	February	this study	questing	38.9614	-9.27833	ethanol 70%	morph, mol	DNAeasy blood and tissue kit, Qiagen
3117DZ16	3117DZ16	Ixodes inopinatus	2016		positive	yes: ID 3117	Algeria	Kabylie		October	this study	ex cattle	36.6289	4.57211	ethanol 70%	morph, mol	MagNA Pure96 DNA and Viral NA Small Volume Kit, Roche
T73T04DZ16‡	T73T04DZ16	Ixodes ricinus	2016		positive		Algeria	Kabylie		January	this study	ex cattle	36.6951	4.55725	ethanol 70%	morph, mol	MagNA Pure96 DNA and Viral NA Small Volume Kit, Roche
3115DZ16	3115DZ16	Ixodes ricinus	2016		positive		Algeria	Kabylie		November	this study	ex cattle	36.6906	4.57449	ethanol 70%	morph, mol	MagNA Pure96 DNA and Viral NA Small Volume Kit, Roche
MH152SK17‡	MH152SK17	Ixodes ricinus	2017	M	positive		Slovakia	Martinske hole			this study	questing	49,085464,	18.863	ethanol 70%	morph, mol
MH149SK14‡	MH149SK14	Ixodes ricinus	2014	M	positive		Slovakia	Martinske hole			this study	questing	49,085464,	18.863	ethanol 70%	morph, mol
MH139SK14	MH139SK14	Ixodes ricinus	2014	M	positive	yes: ID 2653	Slovakia	Martinske hole			this study	questing	49,085464,	18.863	ethanol 70%	morph, mol
MH106SK17‡	MH106SK17	Ixodes ricinus	2017	F	positive		Slovakia	Martinske hole			this study	questing	49,085464,	18.863	ethanol 70%	morph, mol
MH60SK17‡	MH60SK17	Ixodes ricinus	2017	F	positive		Slovakia	Martinske hole			this study	questing	49,085464,	18.863	ethanol 70%	morph, mol
2874SK16‡	2874SK16	Ixodes ricinus	2016	F	positive		Slovakia	Martinske hole			this study	questing	49,085464,	18.863	ethanol 70%	morph, mol
MH126SK14‡	MH126SK14	Ixodes ricinus	2014	F	positive		Slovakia	Martinske hole			this study	questing	49,085464,	18.863	ethanol 70%	morph, mol
2652SK16	2652SK16	Ixodes ricinus	2016	F	positive	yes: ID 2652	Slovakia	Martinske hole			this study	questing	49,085464,	18.863	ethanol 70%	morph, mol
11-E12	11-E12	Ixodes inopinatus	2018	N	negative		Germany	Starnberg-Herrsching			Rollins et al 2021	great tit				morph, mol	BioSprint 96 One-For-All Vet Kit, Qiagen
7-F5	7-F5	Ixodes inopinatus	2018	N	negative		Germany	Starnberg-Herrsching			Rollins et al 2021	great tit				morph, mol	BioSprint 96 One-For-All Vet Kit, Qiagen
8-C12	8-C12	Ixodes inopinatus	2018	N	negative		Germany	Starnberg-Herrsching			Rollins et al 2021	great tit				morph, mol	BioSprint 96 One-For-All Vet Kit, Qiagen
NP = national park
morph = morphological
mol = molecular
‡Sequence detected in more than one country
# designated I. ricinus by Noureddine et al. 2011 but now designated I. inopinatus in GenBank

## Sheet: Table S2 Borrelia
Table S2 Borrelia samples included in this study, sequence type (ST) number (if available), allele numbers of the seven genes included for analyses and details of sample processing
sample no.	sample identification	Strain	genospecies	country	area	longitude	latitude	Portuguese area	continent	ST	collection year	detailed_source	Tick code	stored	ST	clpA	clpX	nifS	pepX	pyrG	recG	rplB	source	DNA extraction	sreening PCR	second PCR	positive control	PCR reference
1	59	162/11b	Borrelia lusitaniae	Serbia	Belgrade area-Titov gaj	44.7486	20.5348		Europe	628	2011	Ixodes ricinus			628	101	22	20	123	176	118	155	MLST DB
2	63	167/11b	Borrelia lusitaniae	Serbia	Belgrade area-Kosutnjak	44.7524	20.4377		Europe	628	2011	Ixodes ricinus			628	101	22	20	123	176	118	155	MLST DB
3	64	167/11c	Borrelia lusitaniae	Serbia	Belgrade area-Kosutnjak	44.7524	20.4377		Europe	136	2011	Ixodes ricinus			136	74	173	147	47	51	186	48	MLST DB
4	124	PoTiBGr41	Borrelia lusitaniae	Portugal	Grandola (South Tagus)			South Tagus	Europe	60	2002	Ixodes ricinus			60	26	15	18	21	13	22	13	MLST DB
5	125	PoTiBGr82	Borrelia lusitaniae	Portugal	Grandola (South Tagus)			South Tagus	Europe	61	2002	Ixodes ricinus			61	27	16	18	22	13	23	14	MLST DB
6	126	PoTiBGr130	Borrelia lusitaniae	Portugal	Grandola (South Tagus)			South Tagus	Europe	62	2003	Ixodes ricinus			62	27	17	18	22	13	23	14	MLST DB
7	127	PoTiBGr131	Borrelia lusitaniae	Portugal	Grandola (South Tagus)			South Tagus	Europe	63	2003	Ixodes ricinus			63	28	18	18	21	14	22	13	MLST DB
8	128	PoTiBGr136	Borrelia lusitaniae	Portugal	Grandola (South Tagus)			South Tagus	Europe	64	2003	Ixodes ricinus			64	29	19	18	23	14	24	15	MLST DB
9	129	PoTibGr409	Borrelia lusitaniae	Portugal	Grandola (South Tagus)			South Tagus	Europe	64	2003	Ixodes ricinus			64	29	19	18	23	14	24	15	MLST DB
10	130	PoTiBGr143	Borrelia lusitaniae	Portugal	Grandola (South Tagus)			South Tagus	Europe	65	2003	Ixodes ricinus			65	30	15	18	21	13	23	16	MLST DB
11	131	PoTiBGr211	Borrelia lusitaniae	Portugal	Grandola (South Tagus)			South Tagus	Europe	65	2003	Ixodes ricinus			65	30	15	18	21	13	23	16	MLST DB
12	132	PoTiBGr209	Borrelia lusitaniae	Portugal	Grandola (South Tagus)			South Tagus	Europe	66	2003	Ixodes ricinus			66	26	20	18	22	15	22	17	MLST DB
13	133	PoTiBGr213	Borrelia lusitaniae	Portugal	Grandola (South Tagus)			South Tagus	Europe	66	2003	Ixodes ricinus			66	26	20	18	22	15	22	17	MLST DB
14	134	PoTiBGr288	Borrelia lusitaniae	Portugal	Grandola (South Tagus)			South Tagus	Europe	67	2003	Ixodes ricinus			67	28	15	18	24	16	22	18	MLST DB
15	135	PoTiBGr293	Borrelia lusitaniae	Portugal	Grandola (South Tagus)			South Tagus	Europe	68	2003	Ixodes ricinus			68	26	19	18	22	17	23	19	MLST DB
16	136	PoHL1	Borrelia lusitaniae	Portugal	Lisbon				Europe	69	2002	human			69	31	19	19	25	18	25	20	MLST DB
17	137	PoTiBL37	Borrelia lusitaniae	Portugal	Mafra (North Tagus)			North Tagus	Europe	69	1999	Ixodes ricinus			69	31	19	19	25	18	25	20	MLST DB
18	249	PotiB2	Borrelia lusitaniae	Portugal	(South Tagus)				Europe	64		Ixodes ricinus			64	29	19	18	23	14	24	15	MLST DB
19	374	71412L	Borrelia lusitaniae	Latvia		56.8374	23.7872		Europe	218	2007	Ixodes ricinus			218	101	21	20	27	86	85	74	MLST DB
20	1164	0911001A	Borrelia lusitaniae	Austria	North-Tirol	10.8167	47.45		Europe	336	2009	Ixodes ricinus			336	133	95	94	27	115	118	100	MLST DB
21	1181	0921035A	Borrelia lusitaniae	Austria	North-Tirol	10.8813	47.4017		Europe	345	2009	Ixodes ricinus			345	101	97	94	26	18	118	100	MLST DB
22	1182	0921036A	Borrelia lusitaniae	Austria	North-Tirol	10.8813	47.4017		Europe	346	2009	Ixodes ricinus			346	136	97	97	123	18	118	101	MLST DB
23	1250	233/13b	Borrelia lusitaniae	Serbia	Belgrade area-Avala	44.6933	20.5067		Europe	148	2013	Ixodes ricinus			148	101	52	94	27	18	118	74	MLST DB
24	1252	221/10c	Borrelia lusitaniae	Serbia	Belgrade area-Titov gaj	44.7486	20.5348		Europe	153	2013	Ixodes ricinus			153	101	56	94	12	18	25	74	MLST DB
25	1253	225/10a	Borrelia lusitaniae	Serbia	Belgrade area-Titov gaj	44.7486	20.5348		Europe	630	2013	Ixodes ricinus			630	189	22	94	161	18	118	74	MLST DB
26	1254	228/10a	Borrelia lusitaniae	Serbia	Belgrade area-Titov gaj	44.7486	20.5348		Europe	194	2013	Ixodes ricinus			194	101	60	147	169	18	186	154	MLST DB
27	1255	229/10a	Borrelia lusitaniae	Serbia	Belgrade area-Kosutnjak	44.7524	20.4377		Europe	209	2013	Ixodes ricinus			209	101	60	20	47	115	186	154	MLST DB
28	1585	76/12a	Borrelia lusitaniae	Serbia	Eastern Serbia-Dobra (Djerdap Gorge)	44.6294	21.9088		Europe	580	2012	Ixodes ricinus			580	188	148	94	123	18	171	101	MLST DB
29	1586	77/12b	Borrelia lusitaniae	Serbia	Eastern Serbia-Dobra (Djerdap Gorge)	44.6294	21.9088		Europe	586	2012	Ixodes ricinus			586	189	149	135	161	167	25	21	MLST DB
30	1815	220/10b	Borrelia lusitaniae	Serbia	Belgrade area-Kosutnjak	44.7524	20.4377		Europe	628	2010	Ixodes ricinus			628	101	22	20	123	176	118	155	MLST DB
31	1817	222/10d	Borrelia lusitaniae	Serbia	Belgrade area-Titov gaj	44.7486	20.5348		Europe	629	2010	Ixodes ricinus			629	101	163	147	169	18	186	154	MLST DB
32	1819	224/10c	Borrelia lusitaniae	Serbia	Belgrade area-Titov gaj	44.7486	20.5348		Europe	630	2010	Ixodes ricinus			630	189	22	94	161	18	118	74	MLST DB
33	1821	226/10d	Borrelia lusitaniae	Serbia	Belgrade area-Titov gaj	44.7486	20.5348		Europe	631	2010	Ixodes ricinus			631	101	21	20	27	177	25	100	MLST DB
34	1822	227/10c	Borrelia lusitaniae	Serbia	Belgrade area-Titov gaj	44.7486	20.5348		Europe	630	2010	Ixodes ricinus			630	189	22	94	161	18	118	74	MLST DB
35	2073	PoTiB3	Borrelia lusitaniae	Portugal	(South Tagus)				Europe	766	1993	Ixodes ricinus			766	248	18	18	22	14	22	14	MLST DB
36	2526	PotiBmfP220	Borrelia lusitaniae	Portugal	Mafra (North Tagus)			North Tagus	Europe	nd	2003	Ixodes ricinus			7-004	32	18	18	22	14	26	14	MLST DB
37	2527	PotiBmfJ2	Borrelia lusitaniae	Portugal	Mafra (North Tagus)			North Tagus	Europe	nd	2001	Ixodes ricinus			7-005	33	21	20	26	18	25	20	MLST DB
38	2529	PotiBmfP364	Borrelia lusitaniae	Portugal	Mafra (North Tagus)			North Tagus	Europe	nd	2003	Ixodes ricinus			7-006	34	22	21	27	19	25	21	MLST DB
39	2525	PotiBmfP147	Borrelia lusitaniae	Portugal	Mafra (North Tagus)			North Tagus	Europe	nd	2003	Ixodes ricinus			7-011	31	19	19	25	18	25	20	MLST DB
40	2528	PotiBmfJ50	Borrelia lusitaniae	Portugal	Mafra (North Tagus)			North Tagus	Europe	nd	2003	Ixodes ricinus			7-005	33	21	20	26	18	25	20	MLST DB
41	2500	82NCHG	Borrelia lusitaniae	Croatia	Grabovac	44.9713	15.6403		Europe	900	2011	Ixodes ricinus, questing		70 % Ethanol	900	101	22	20	123	18	172	250	this study		5S-23S rRNA IGS			Dedakova et al. 2003
42	2594	658 UA	Borrelia lusitaniae	Ukraine	Kyiv, M.M. Gryshko Botanical Garden	50.4151	30.557		Europe	909	2015	Ixodes ricinus, questing		70 % Ethanol	909	101	148	20	27	18	25	20	this study		5S-23S rRNA IGS			Dedakova et al. 2003
43	2652	MH2016F8	Borrelia lusitaniae	Slovakia	Martinské hole mountain	49.0855	18.863		Europe	918	2016	Ixodes ricinus, questing	2652SK16	70 % Ethanol	918	101	21	94	27	18	25	20	this study		5S-23S rRNA IGS			Dedakova et al. 2003
44	2653	SMHM139	Borrelia lusitaniae	Slovakia	Martinské hole mountain	49.0855	18.863		Europe	919	2013	Ixodes ricinus, questing	MH139SK14	70 % Ethanol	919	133	21	20	27	18	25	21	this study		5S-23S rRNA IGS			Dedakova et al. 2003
52	3126	PoTiB10/M436	Borrelia lusitaniae	Portugal	Madeira (Island)	32.7365	-17.1766	Madeira island	Europe	925	2009	Ixodes ricinus, questing		70 % Ethanol	925	101	260	234	27	19	118	20	this study	ammonia extraction	5S-23S rRNA IGS, flaB, nested		B. japonica	Rijpkema et al. 1995; Johnson et al. 1992
53	3127	PoTiB11/T3087	Borrelia lusitaniae	Portugal	Coimbra (North Tagus)	40.2454	-8.40234	North Tagus	Europe	926	2014	Ixodes ricinus ex Psammodromus		70 % Ethanol	926	32	18	18	24	14	22	14	this study	ammonia extraction	flaB, nested		B. japonica	Johnson et al. 1992
51	3125	PoTiB9/B88	Borrelia lusitaniae	Portugal	Santiago do Cacém (South Tagus)	38.041	-8.74575	South Tagus	Europe	924	2009	Dermacentor marginatum, questing		alive, inoculation in BSK	924	27	19	18	22	276	22	14	this study	Dneasy blood & tissue kit	5S-23S rRNA IGS, flaB, nested		B. japonica	Rijpkema et al. 1995; Johnson et al. 1992
45	3114	Tube101-Tick25/run1-2	Borrelia lusitaniae	Algeria	Kabylie, Tizi-Ousou	36.6951	4.55725		Africa	nd	2016	Ixodes ricinus, ex cattle		70 % Ethanol	7-000	299	18	18	22	14	26	14	this study	MagNA Pure96 DNA and Viral NA Small Volume Kit, Roche	flaB		B. turdi	Hidri et al. 2012
46	3117	Tube104-Tick14/run1-5	Borrelia lusitaniae	Algeria	Kabylie, Tizi-Ousou	36.6289	4.57211		Africa	nd	2016	Ixodes inopinatus? ex cattle	3117DZ16	70 % Ethanol	7-001	28	19	18	22	13	22	13	this study	MagNA Pure96 DNA and Viral NA Small Volume Kit, Roche	flaB		B. turdi	Hidri et al. 2012
47	3118	Tube94-Tick5/run1-6	Borrelia lusitaniae	Algeria	Kabylie, Tizi-Ousou	36.6951	4.55725		Africa	nd	2016	Ixodes ricinus ex cattle		70 % Ethanol	7-002	26	19	18	22	14	22	255	this study	MagNA Pure96 DNA and Viral NA Small Volume Kit, Roche	flaB		B. turdi	Hidri et al. 2012
48	3120	Tube101-Tick24/run1-11	Borrelia lusitaniae	Algeria	Kabylie, Tizi-Ousou	36.6951	4.55725		Africa	nd	2016	Ixodes ricinus ex cattle		70 % Ethanol	7-003	301	18	18	22	14	22	14	this study	MagNA Pure96 DNA and Viral NA Small Volume Kit, Roche	flaB		B. turdi	Hidri et al. 2012
49	3119	Tube 95-Tick5/run1-9	Borrelia lusitaniae	Algeria	Kabylie, Tizi-Ousou	36.6906	4.57449		Africa	nd	2016	Ixodes ricinus ex cattle		70 % Ethanol	7-007	301	18	18	22	14	26	14	this study	MagNA Pure96 DNA and Viral NA Small Volume Kit, Roche	flaB		B. turdi	Hidri et al. 2012
50	3123	Tube94-tick6/run2-7	Borrelia lusitaniae	Algeria	Kabylie, Tizi-Ousou	36.6951	4.55725		Africa	nd	2016	Ixodes ricinus ex cattle		70 % Ethanol	7-008	26	19	18	22	14	26	14	this study	MagNA Pure96 DNA and Viral NA Small Volume Kit, Roche	flaB		B. turdi	Hidri et al. 2012
54	2873	MH2016F1	Borrelia lusitaniae	Slovakia	Martinské hole mountain	49.0855	18.863		Europe	nd	2016	Ixodes ricinus, questing		70 % Ethanol	7-009	101	21	94	27	115	25	101	this study		5S-23S rRNA IGS			Dedakova et al. 2003
55	2874	MH2016F9	Borrelia lusitaniae	Slovakia	Martinské hole mountain	49.0855	18.863		Europe	nd	2016	Ixodes ricinus, questing		70 % Ethanol	7-010	261	262	20	12	18	25	20	this study		5S-23S rRNA IGS			Dedakova et al. 2003
DB = database

## Sheet: Table S3 Hierarchical BAPS 
Table S3 Detailed results of Hierarchical BAPS analyses at levels 1 and 2
Isolate	level 1	level 2
Tube101-Tick25_Algeria	1	1
Tube94-Tick5_Algeria	1	1
Tube101-Tick24_Algeria	1	1
Tube95-Tick5_Algeria	1	1
Tube94-Tick6_Algeria	1	1
2073|PoTiB3|Portugal	1	1
132|PoTiBGr209|Portugal	1	1
133|PoTiBGr213|Portugal	1	1
Tube104-Tick14_Algeria	1	2
127|PoTiBGr131|Portugal	1	2
2526|PotiBmfP220|Portugal	1	2
Bl_T3087_Portugal	1	2
124|PoTiBGr41|Portugal	1	3
135|PoTiBGr293|Portugal	1	3
125|PoTiBGr82|Portugal	1	3
126|PoTiBGr130|Portugal	1	3
BI_B88_y2018_Portugal	1	3
128|PoTiBGr136|Portugal	1	4
129|PoTibGr409|Portugal	1	4
249|PotiB2|Portugal	1	4
130|PoTiBGr143|Portugal	1	5
131|PoTiBGr211|Portugal	1	5
134|PoTiBGr288|Portugal	1	5
59|162/11b|Serbia	2	6
63|167/11b|Serbia	2	6
1815|220/10b|Serbia	2	6
2500|82NCHG|Croatia	2	6
374|71412L|Latvia	2	6
1164|0911001A|Austria	2	6
1182|0921036A|Austria	2	6
1250|233/13b|Serbia	2	6
1585|76/12a|Serbia	2	6
1821|226/10d|Serbia	2	6
2529|PotiBmfP364|Portugal	2	6
2594|658_UA|Ukraine	2	6
2652|MH2016F8|Slovakia	2	6
2653|SMHM139|Slovakia	2	6
Bl_M436_y2018_Portugal	2	6
MH2016F1_Slovakia	2	6
1181|0921035A|Austria	2	6
1252|221/10c|Serbia	2	6
1586|77/12b|Serbia	2	6
1253|225/10a|Serbia	2	6
1819|224/10c|Serbia	2	6
1822|227/10c|Serbia	2	6
2527|PotiBmfJ2|Portugal	2	6
2528|PotiBmfJ50|Portugal	2	6
MH2016F9_Slovakia	2	6
64|167/11c|Serbia	2	7
1254|228/10a|Serbia	2	7
1255|229/10a|Serbia	2	7
1817|222/10d|Serbia	2	7
136|PoHL1|Portugal	2	8
137|PoTiBL37|Portugal	2	8
2525|PotiBmfP147|Portugal	2	8
